# Supplementary material for: Expression Pattern of nos1 in the Developing Nervous System of Ray-Finned Fish
Source: MDPI journal article supplement (doi:10.3390/genes13050918), 2022-05-20
Supplement: s1 [file s1]

**Supplementary Table S1**

| Primers used to synthesize riboprobe for <i>in situ</i> hybridization. |              |                                  |                |
|------------------------------------------------------------------------|--------------|----------------------------------|----------------|
| Species                                                                | Acc. Number  | Sequence (5' > 3')               | Riboprobe size |
| <i>Danio rerio</i>                                                     | NM_131660    | <i>Fw</i> - CAAGCAGCGGGTGTGCAAAC | 908 bp         |
|                                                                        |              | <i>Rv</i> - CTATGCAAACGTGCTCAGTG |                |
| <i>Oryzias latipes</i>                                                 | NM_001104855 | <i>Fw</i> - GTATATGGGCACAGAGATCG | 953 bp         |
|                                                                        |              | <i>Rv</i> - CTTCAAACAGCGTGTCCAC  |                |
| <i>Lepisosteus oculatus</i>                                            | XM_015366414 | <i>Fw</i> - CGACATGAGCTATGAGAGCG | 943 bp         |
|                                                                        |              | <i>Rv</i> - GTCCACATGTGCCTTAGAGC |                |

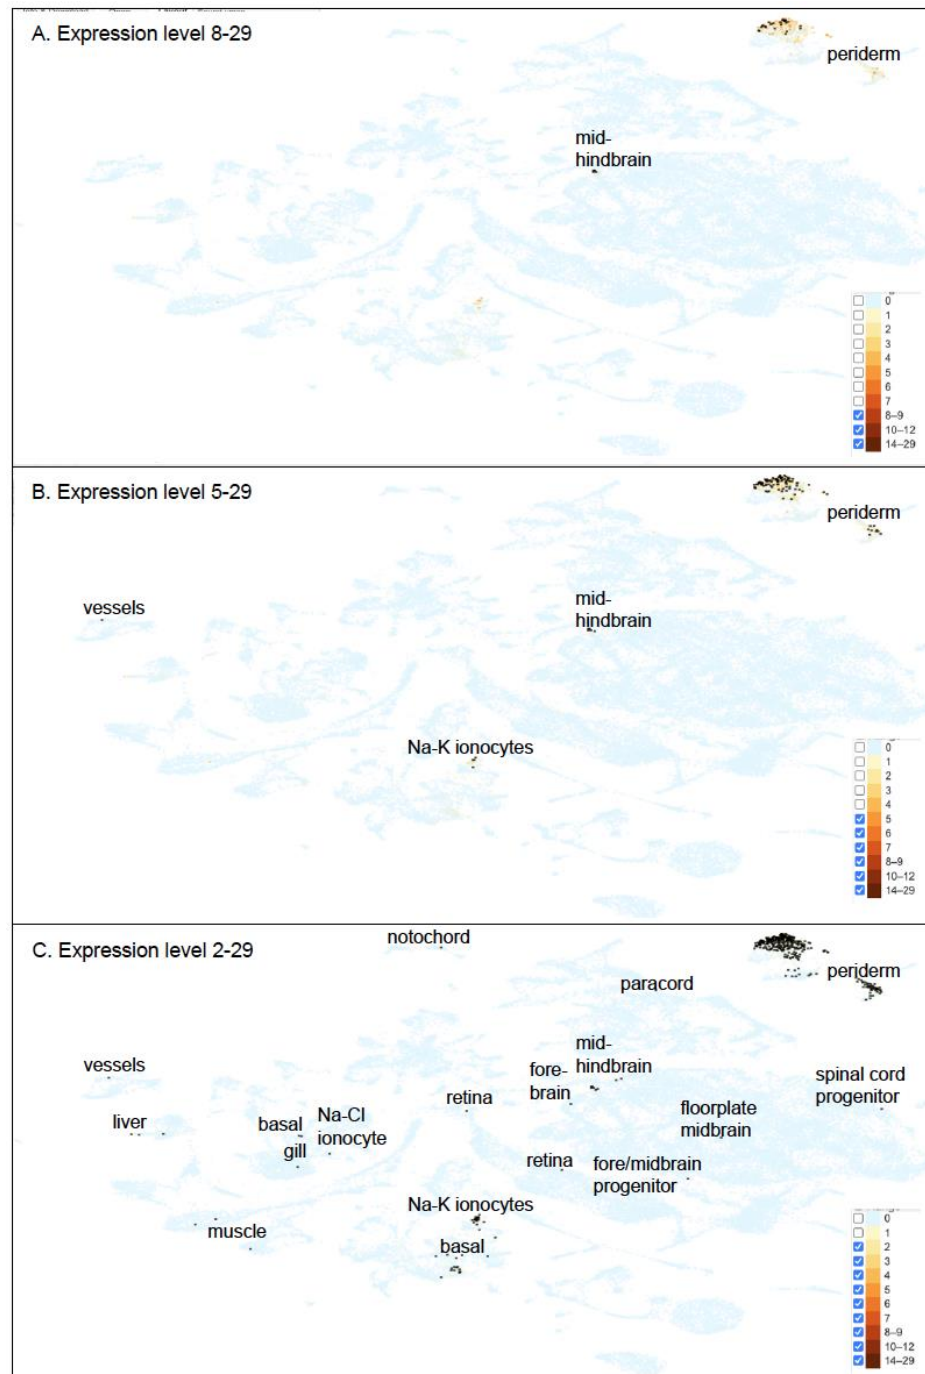

### Supplemental Figure S1. *nos1* expression in scRNA-seq data.

**A.** At the highest levels of expression (levels 8 to 29), *nos1* was expressed in 30 cells that include periderm cells and a highly specific group of midbrain-hindbrain neurons.

**B.** At high and midlevel expression (levels 5 to 29), *nos1* was expressed in 112 cells that included the more periderm and midbrain-hindbrain cells, and in addition, several Na-K ionocytes, and strongly in one blood vessel cell.

**C.** At high, mid-, and low levels (levels 2 to 29), *nos1* transcript was present in additional cells, including muscle, basal skin cells, gill, retina, and in the CNS in the forebrain, floorplate of the midbrain, and in spinal cord progenitor cells.

Data were extracted from the zebrafish gene expression atlas (Farnsworth *et al.*, 2019), and include embryos at 1 and 2 dpf and larvae at 5 dpf. Color scale for expression levels shown at lower right of each panel. Cell identities determined as in Farnsworth *et al.* (2019).

Farnsworth DR, Saunders LM, Miller AC. A single-cell transcriptome atlas for zebrafish development. *Dev. Biol.* (2020) 459: 100-108. doi: 10.1016/j.ydbio.2019.11.008.
